# Supplementary material for: Improving Photocatalytic Activity for Formaldehyde Degradation by Encapsulating C60 Fullerenes into Graphite-like C3N4 through the Enhancement of Built-in Electric Fields
Source: MDPI journal article supplement (doi:10.3390/molecules28155815), 2023-08-02
Supplement: s1 [file s1]

## Supporting information

# Improving Photocatalytic Activity for Formaldehyde Degradation by Encapsulating C<sub>60</sub> Fullerenes into Graphite-like C<sub>3</sub>N<sub>4</sub> through the Enhancement of Built-in Electric Fields

Dongmei Peng <sup>1,2,3</sup>, Zhongfeng Zhang <sup>1,2,3,\*</sup>, Jijuan Zhang <sup>1,2,3</sup> and Yang Yang <sup>1,2,3</sup>

- <sup>1</sup> College of Furniture and Art Design, Central South University of Forestry and Technology, Changsha 410000, China; pengdongmei202210@163.com (D.P.); t20050729@csuft.edu.cn (J.Z.); yang193829@163.com (Y.Y.)
  - <sup>2</sup> Green Furniture Engineering Technology Research Center, National Forestry & Grassland Administration, Changsha 410004, China
  - <sup>3</sup> Green Home Engineering Technology Research Center, Changsha 410004, China
- \* Correspondence: t19990735@csuft.edu.cn

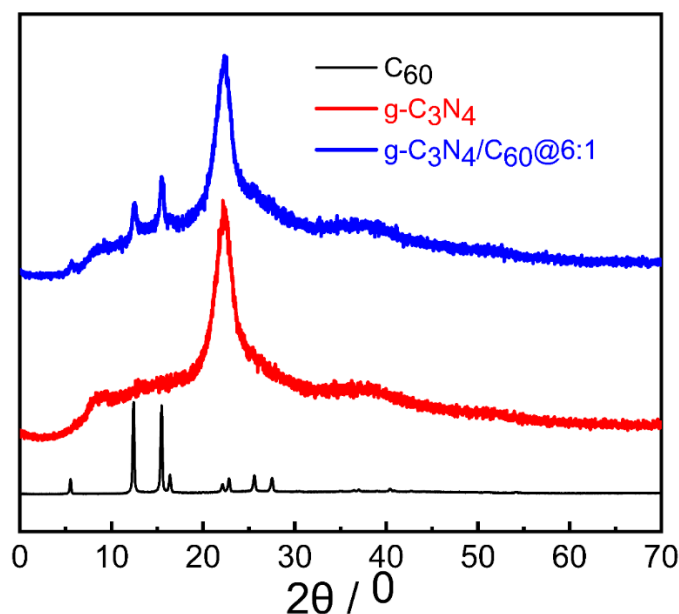

Figure S1. XRD for C<sub>60</sub>, g-C<sub>3</sub>N<sub>4</sub>, and g-C<sub>3</sub>N<sub>4</sub>/C<sub>60</sub>@6:1.

These observations indicate that C<sub>60</sub> was successfully deposited onto g-C<sub>3</sub>N<sub>4</sub> without changing the crystal structure (Figure S1).

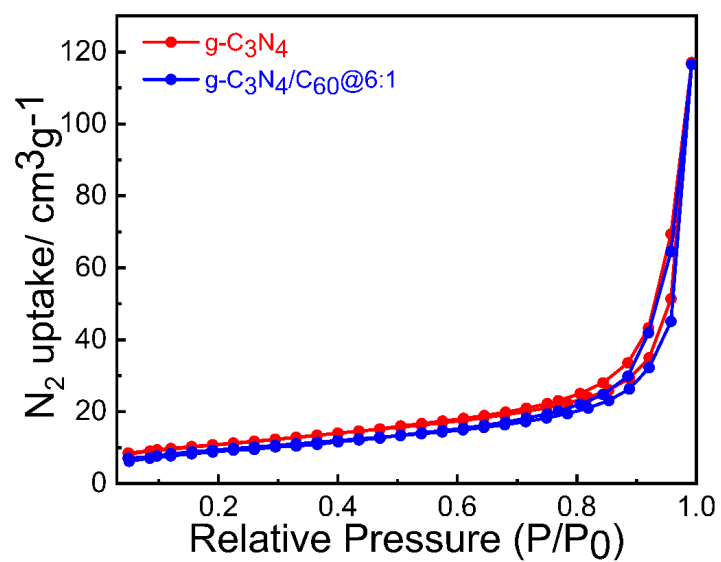

**Figure S2.** Nitrogen adsorption and desorption isotherms of  $g\text{-C}_3\text{N}_4$ , and  $g\text{-C}_3\text{N}_4/\text{C}_{60}@6:1$  at 77 K.

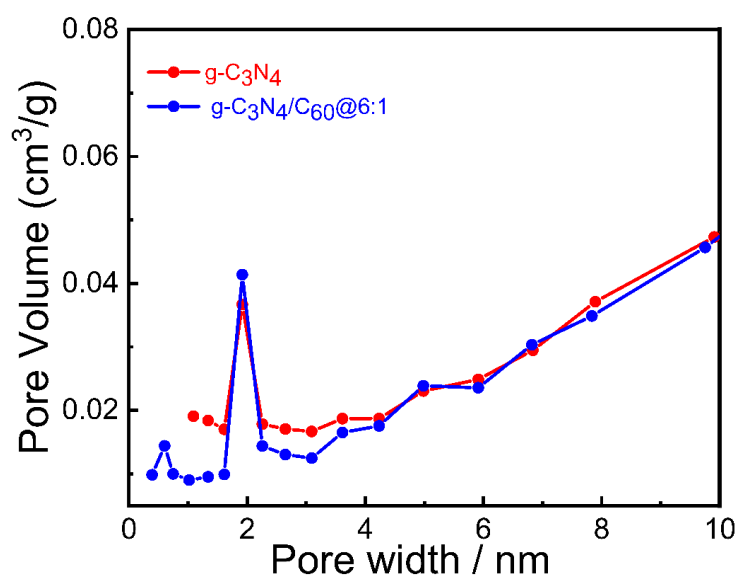

**Figure S3.** pore size distribution for  $g\text{-C}_3\text{N}_4$  and  $g\text{-C}_3\text{N}_4/\text{C}_{60}@6:1$ .
